# Supplementary material for: Effectiveness of a polyvinylpyrrolidone interlayer on a zinc oxide film for interfacial modification in inverted polymer solar cells
Source: Royal Society of Chemistry journal article supplement (doi:10.1039/c4ra08613a), 2014-09-26
Supplement: c4ra08613a1.pdf [file c4ra08613a1.pdf]

## Electronic Supporting Information (ESI)

# Effectiveness of polyvinylpyrrolidone interlayer on zinc oxide film for interfacial modification in inverted polymer solar cells

Raju Lampande,<sup>a</sup> Gyeong Woo Kim,<sup>a</sup> Ramchandra Pode,<sup>b</sup> and Jang Hyuk Kwon<sup>\*a</sup>

<sup>a</sup>Department of Information Display, Kyung Hee University, Dongdaemoon-gu, Seoul 130-701, Republic of Korea

<sup>b</sup> Department of Physics, Kyung Hee University, Dongdaemoon-gu, Seoul 130-701, Republic of Korea.

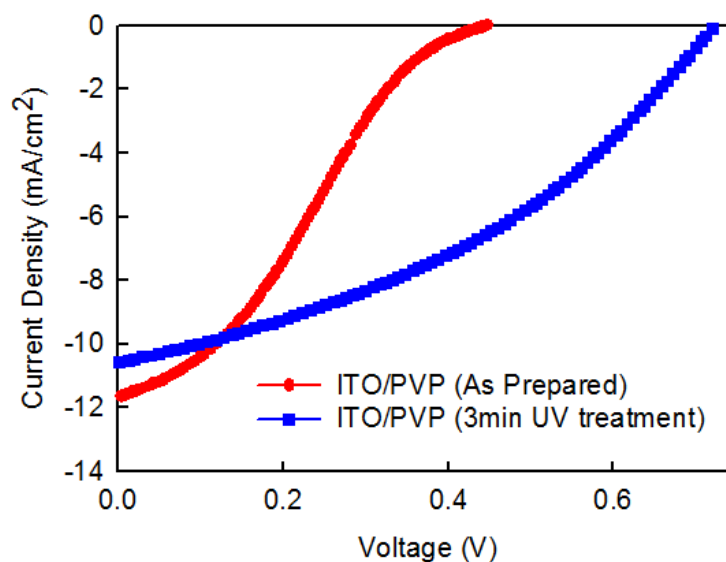

**Fig. S1** Current density versus Voltage characteristics of Device C: Glass/ITO/PVP/PTB7:PC<sub>70</sub>BM/WO<sub>3</sub>/Al measured under AM 1.5 G illuminations with intensity of 100mW/cm<sup>2</sup> in ambient air before and after 3min UV treatment on ITO/PVP electrode through glass side.

10

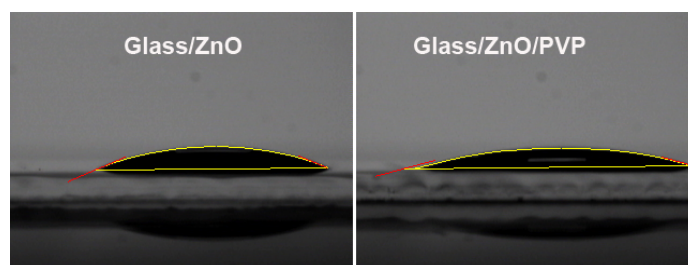

**Fig. S2** Contact angle test of ZnO and ZnO/PVP

15

20

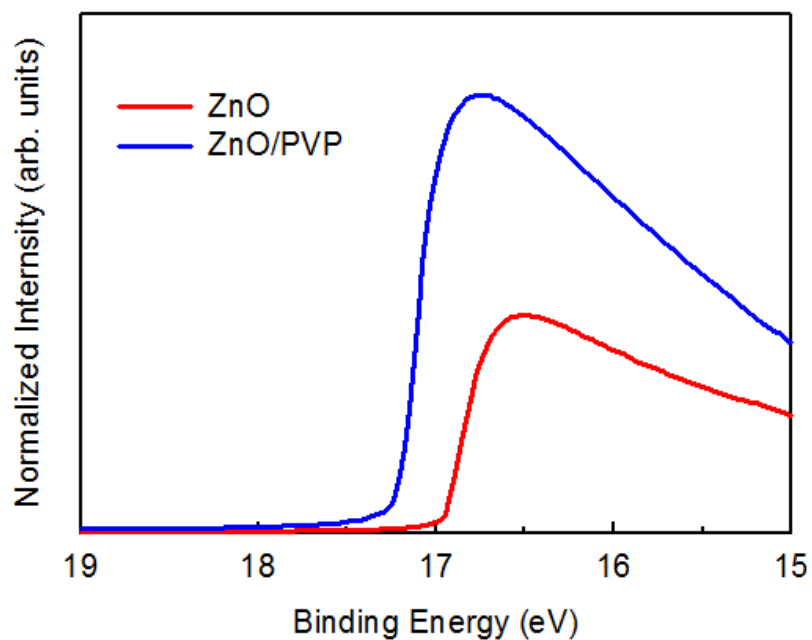

5 **Fig. S3** UPS measurement of ZnO (Red solid line) and ZnO/PVP (blue solid line).

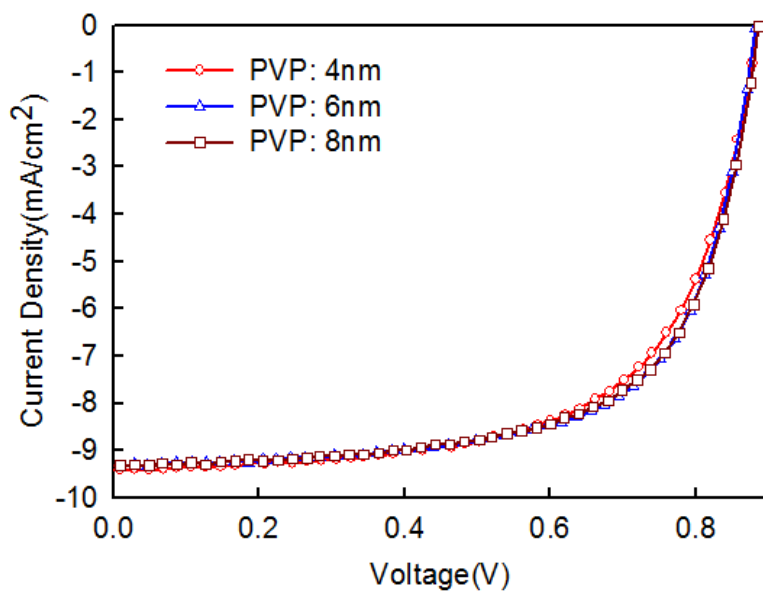

10

**Fig. S4** Current density versus Voltage characteristics of the following device configuration: Glass/ITO/ZnO (30nm)/PVP (4, 6, 8nm)/P3HT: ICBA (80nm)/WO<sub>3</sub> (5nm)/Al (100nm) measured under AM 1.5 G illuminations with intensity of 100mW/cm<sup>2</sup> in ambient air.

**5 Table S1.** Summary of performance parameters of P3HT: ICBA based solar cells fabricated with different thickness of PVP layer.

| Device       | Voc ( V )  | Jsc ( mA/cm <sup>2</sup> ) | F.F ( % ) | Eff. ( % ) |
|--------------|------------|----------------------------|-----------|------------|
| ZnO/PVP(4nm) | 0.88±0.005 | 9.41±0.13                  | 63.40±0.1 | 5.28±0.06  |
| ZnO/PVP(6nm) | 0.88±0.003 | 9.33±0.08                  | 66.32±0.5 | 5.46±0.03  |
| ZnO/PVP(8nm) | 0.88±0.003 | 9.32±0.02                  | 65.43±0.8 | 5.40±0.09  |
| ZnO          | 0.86±0.008 | 9.16±0.10                  | 64.94±0.2 | 5.13±0.02  |
